# Supplementary material
Source: Elsevier journal article supplement (https://complete.bioone.org/journals/supplementalcontent/10.1016//j.rama.2022.02.007/mmc1.pdf)
Supplement: mmc1 [file mmc1.pdf]

# Scoring Rumen Fill

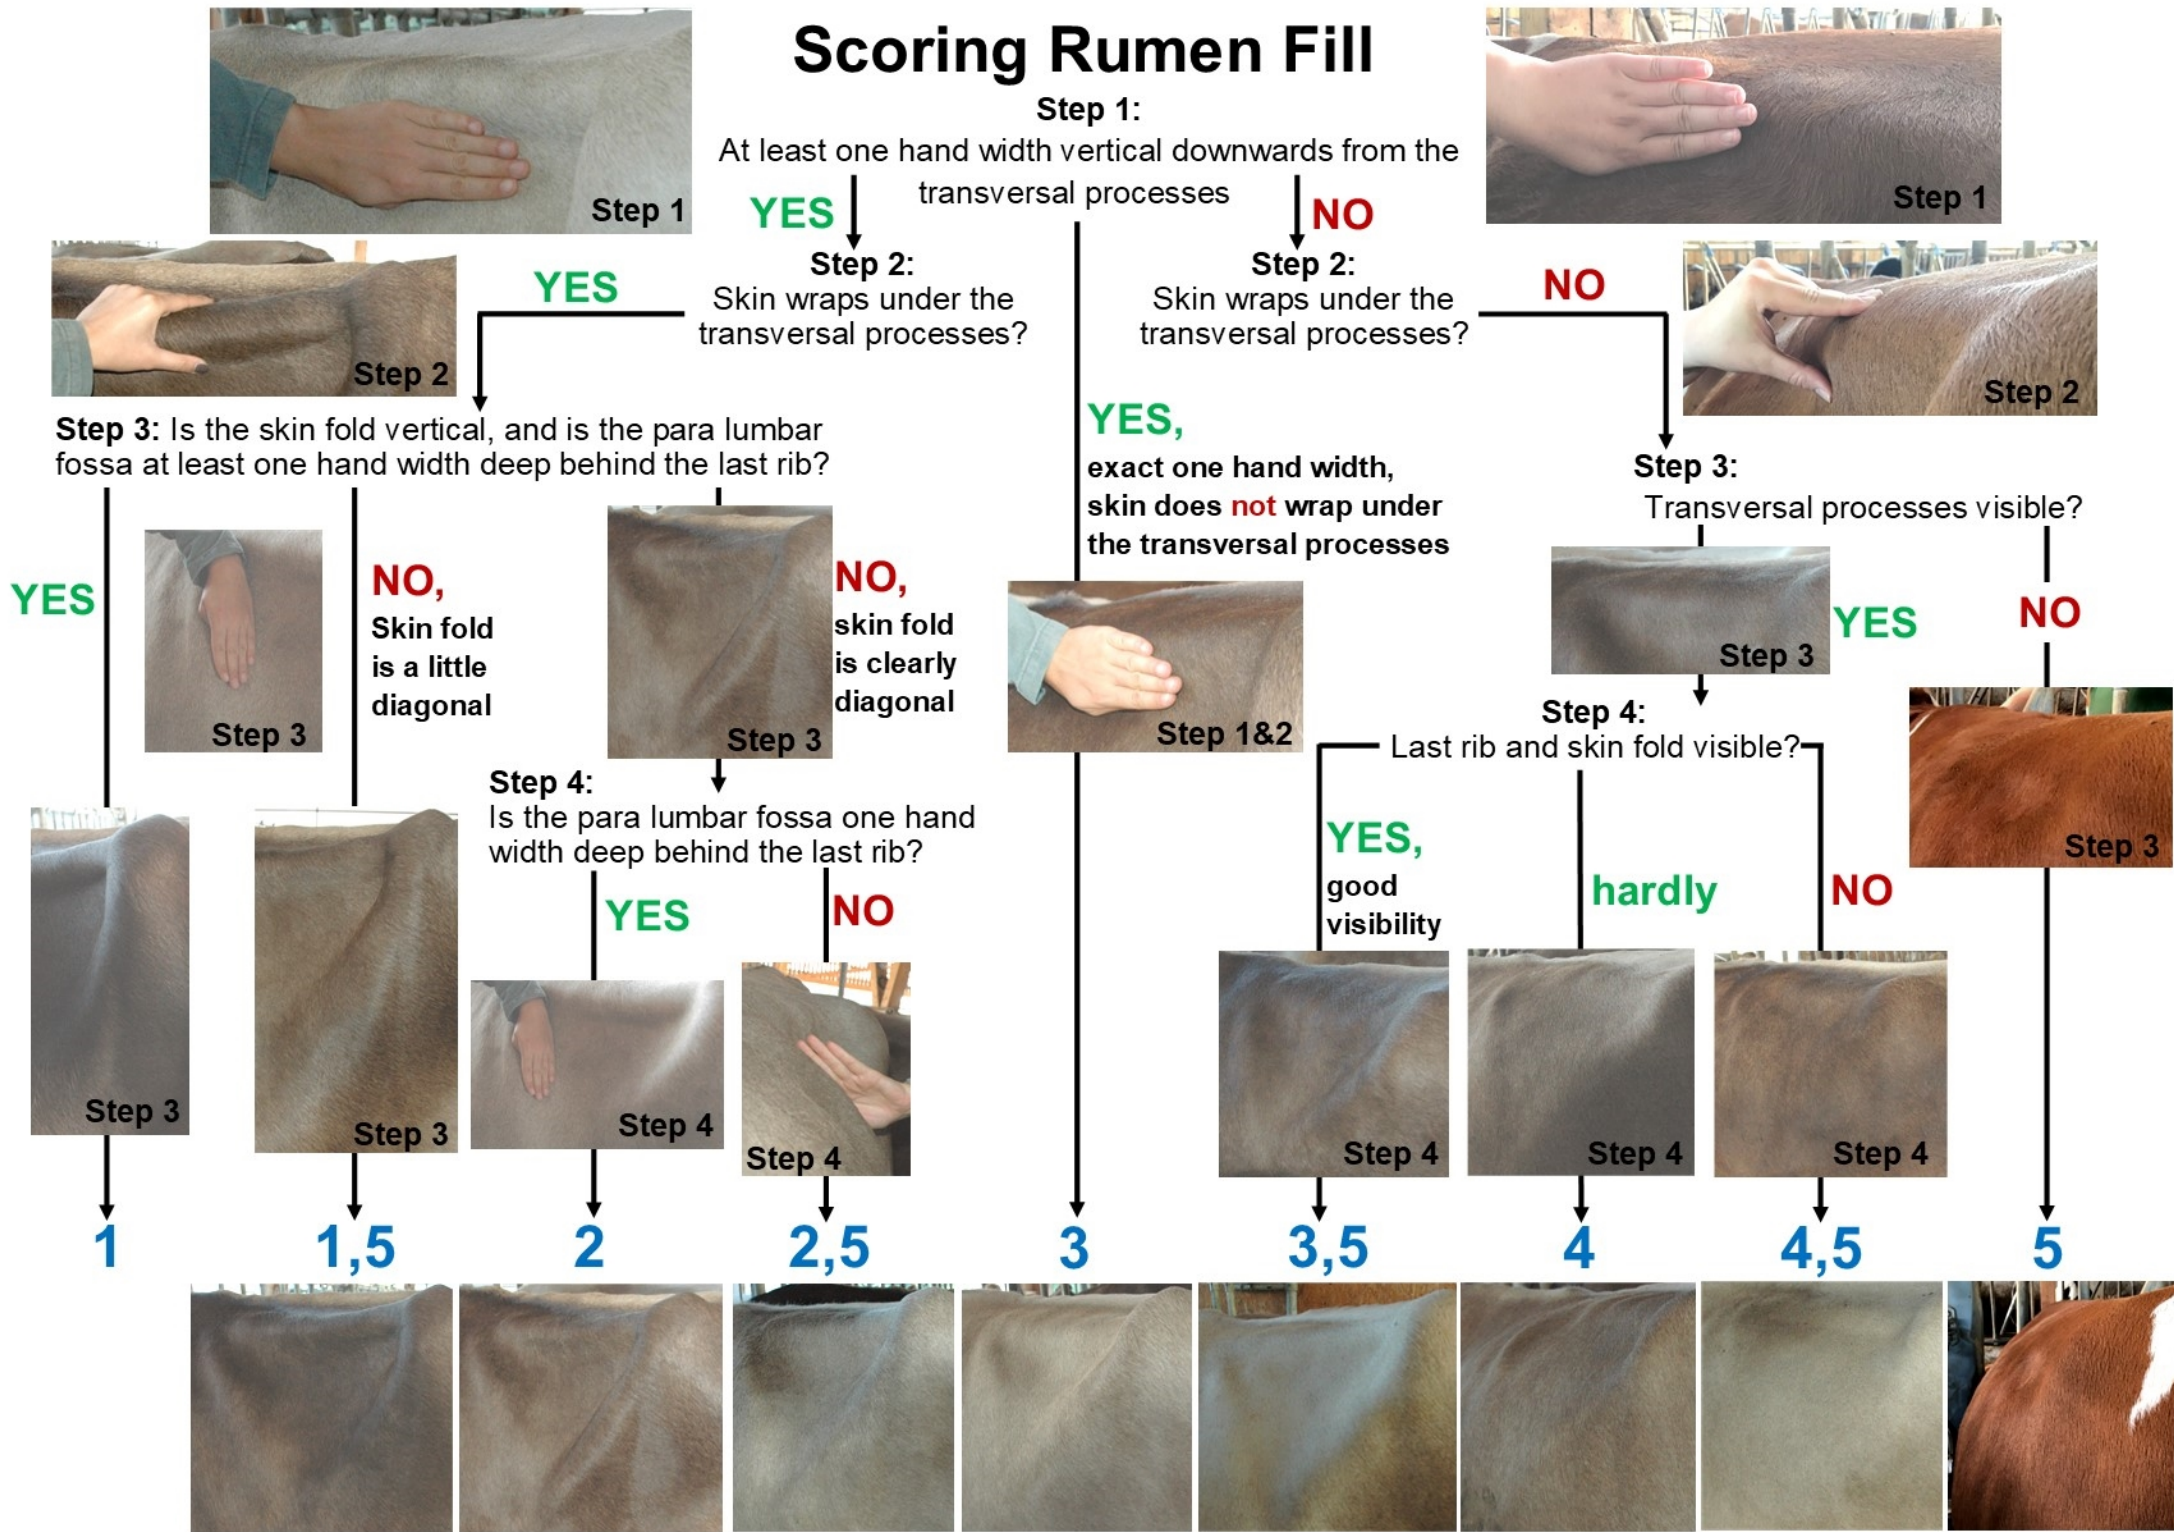

## Scoring Rumen Fill

- The cows have to be fixed on a level surface.
- To score rumen fill, para lumbar fossa on the left side of the cow has to be observed.
- The observer stands on the cow's left side, next to the pelvic bone.
- The observer has to observe the para lumbar fossa for a while, because the appearance changes through rumen activity.

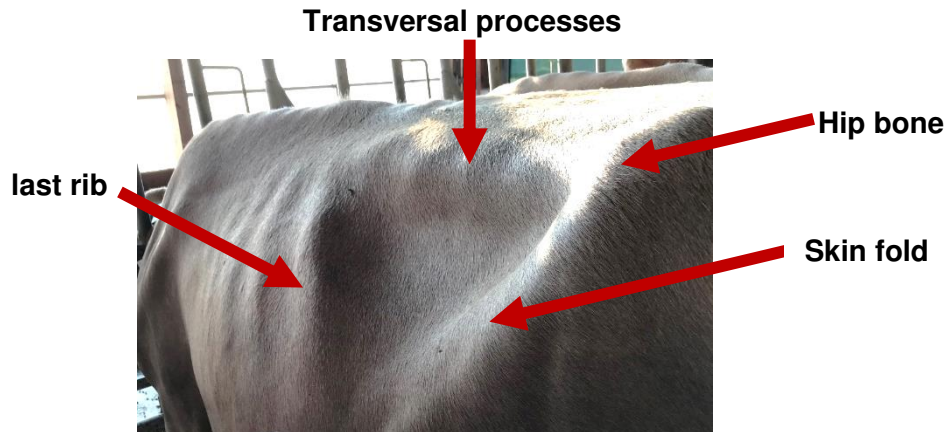

- The mean hand width is 8.2 cm.

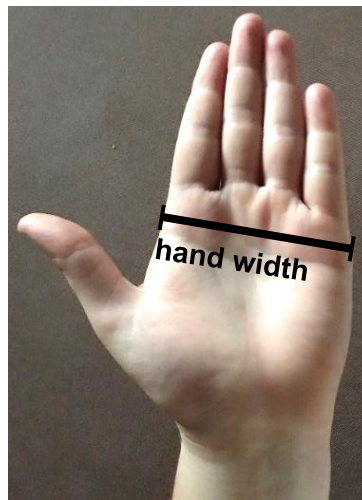

8.2 cm =

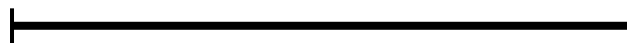

- Step 3: The transversal processes were visible if the skin is vertical downwards on their end. They are not visible, if the para lumbar fossa is that distended that the skin goes a little horizontally at the end of the transversal processes.
